# Supplementary material
Source: Royal Society of Chemistry journal article supplement (doi:10.1039/d6dt00867d)
Supplement: d6dt00867d1.pdf [file d6dt00867d1.pdf]

## Electronic Supplementary Information (ESI)

### Molecular Engineering of an 2,5-dithiophen-2-yl-pyrrole Bridged Terpyridine-Fe(II) Coordination Polymer toward Multi-State Electrochromic Energy Storage

Yuting Song <sup>a</sup>, Hui Qiao <sup>b</sup>, Lin Cheng <sup>a</sup>, Zibo Wei <sup>a</sup>, Beili Lu <sup>a\*</sup>, Biao Huang <sup>a\*</sup>, Jiayu Tao<sup>a\*</sup>

*a* College of Material Engineering, Fujian Agriculture and Forestry University, Fuzhou, 350108, P.

*R. China*

*b* Zhejiang Academy of Forestry, Liuhe Road 399, Hangzhou, 310023, China

\* Corresponding authors: E-mail: [taojiayu@fafu.edu.cn](mailto:taojiayu@fafu.edu.cn); (J. Tao) [bhuang@fafu.edu.cn](mailto:bhuang@fafu.edu.cn) (B. Huang);

[lubl@fafu.edu.cn](mailto:lubl@fafu.edu.cn) (B. Lu)

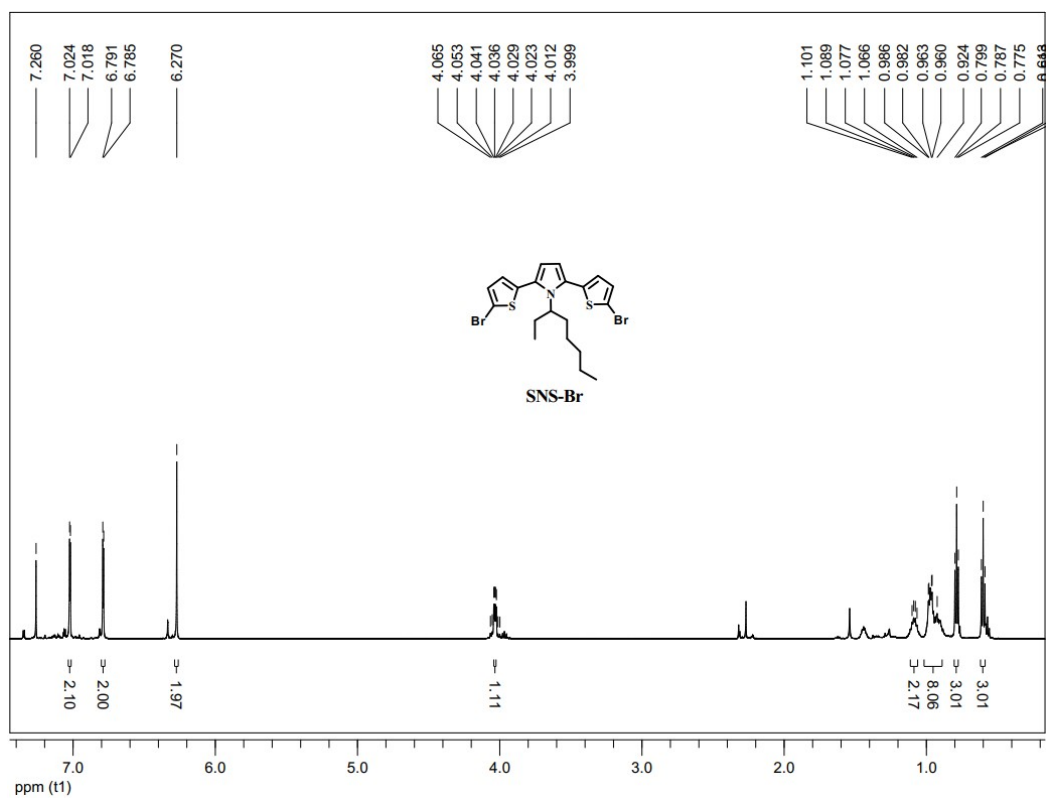

**Fig. S1.**  $^1\text{H}$  NMR spectra of compound SNSBr

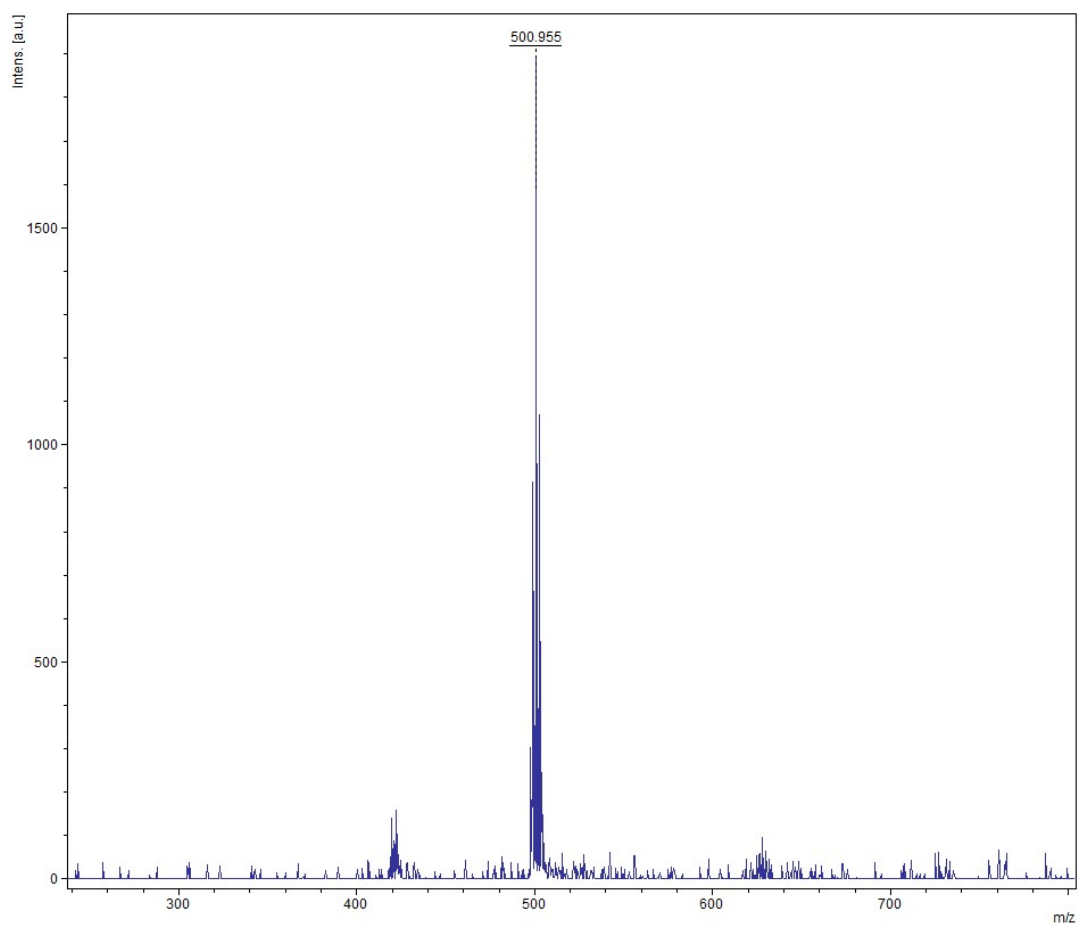

**Fig. S2.** MALDI-TOF spectra of SNSBr

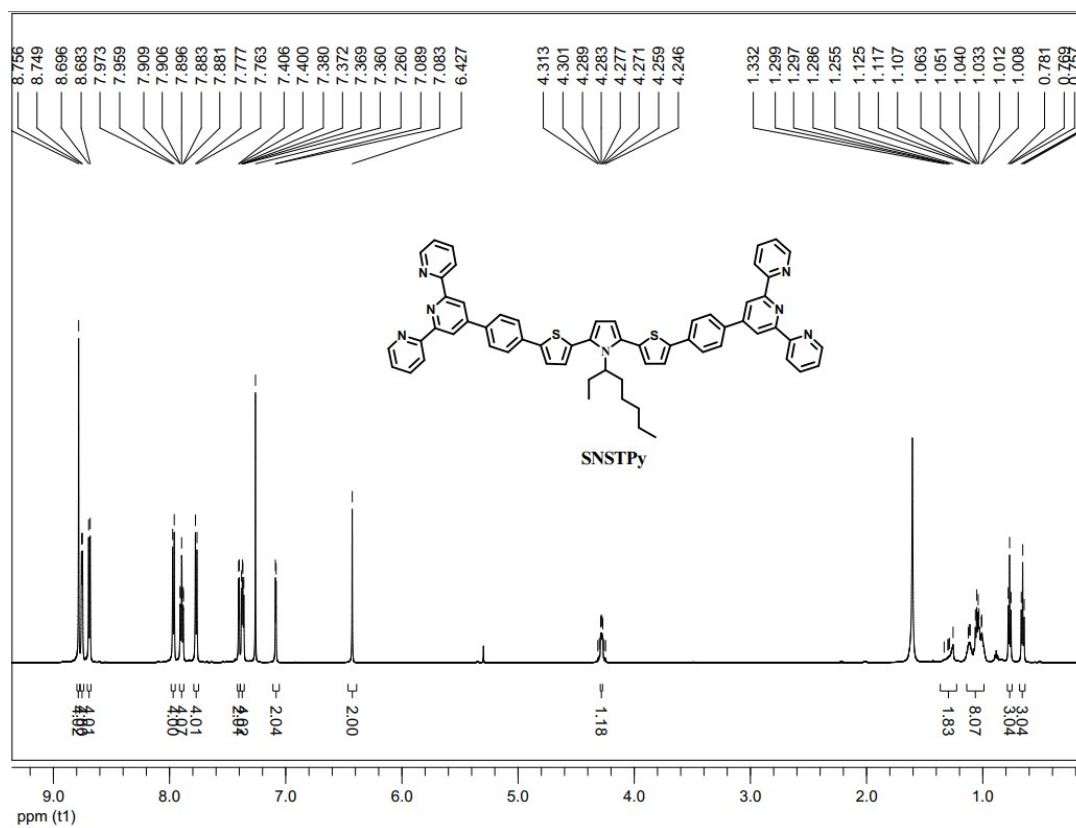

Fig. S3. <sup>1</sup>H NMR spectra of compound SNSTPy

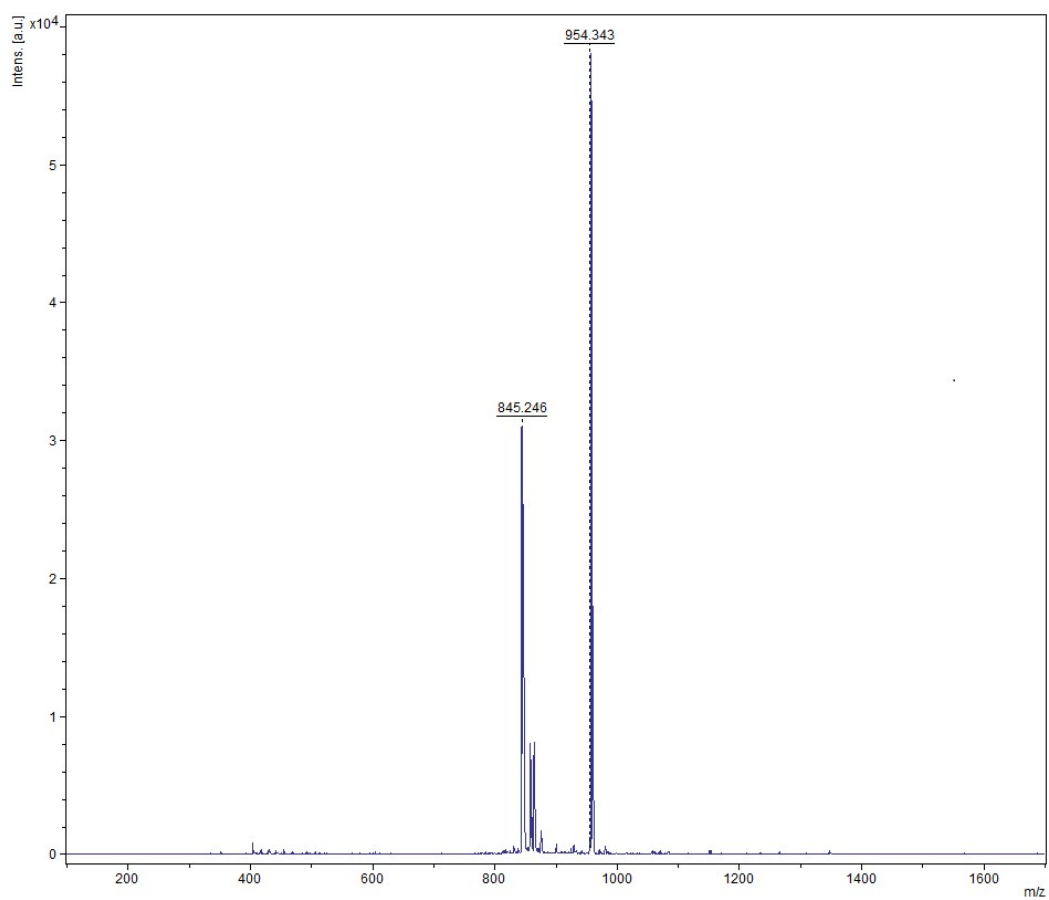

Fig. S4. MALDI-TOF spectra of SNSTPy

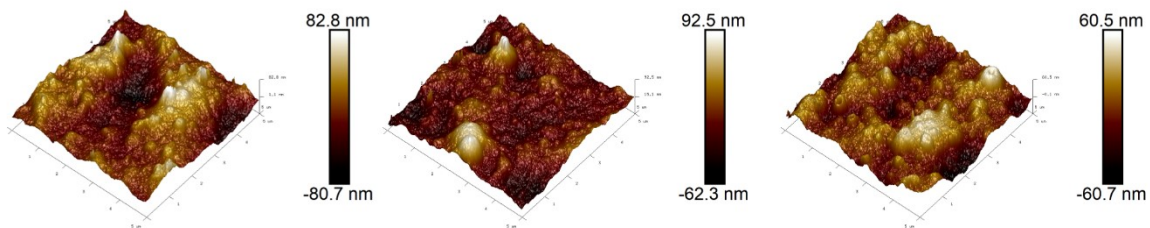

**Fig. S5.** 3D AFM height image of the FeSNSTPy film selected randomly from the surface.

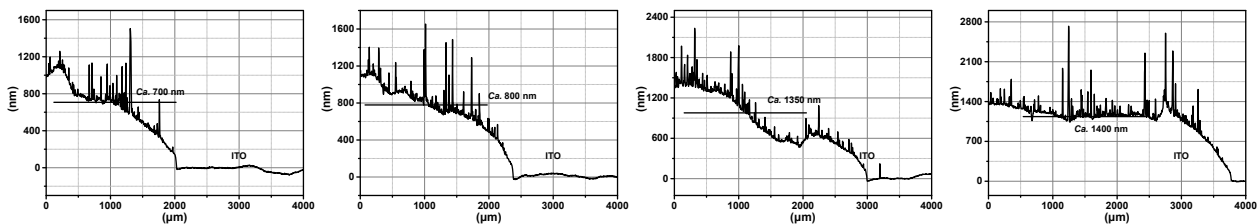

**Fig. S6.** The thickness of FeSNSTPy film measured with a step profiler selected randomly from the surface.

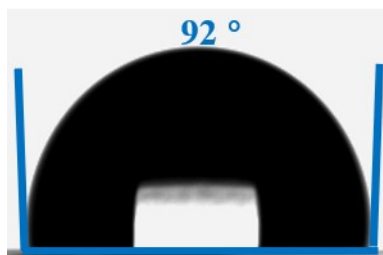

**Fig. S7.** Contact angle of FeSNSTPy film on ITO.

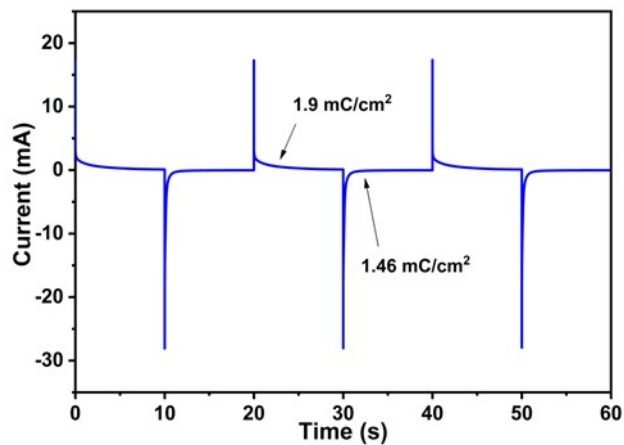

**Fig. S8.** Charge/discharge curve of polymer film FeSNSTPy, applied potential 0-1.25 V

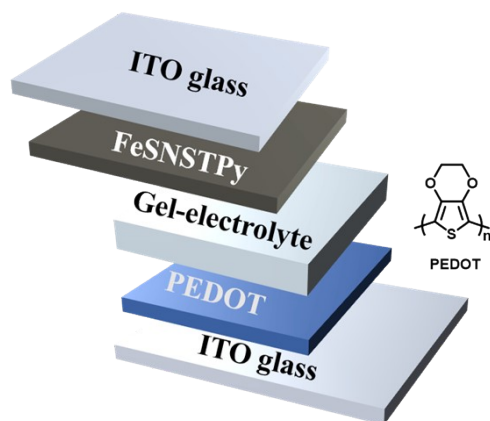

Fig. S9. Schematic diagram of gel-type electrochromic devices

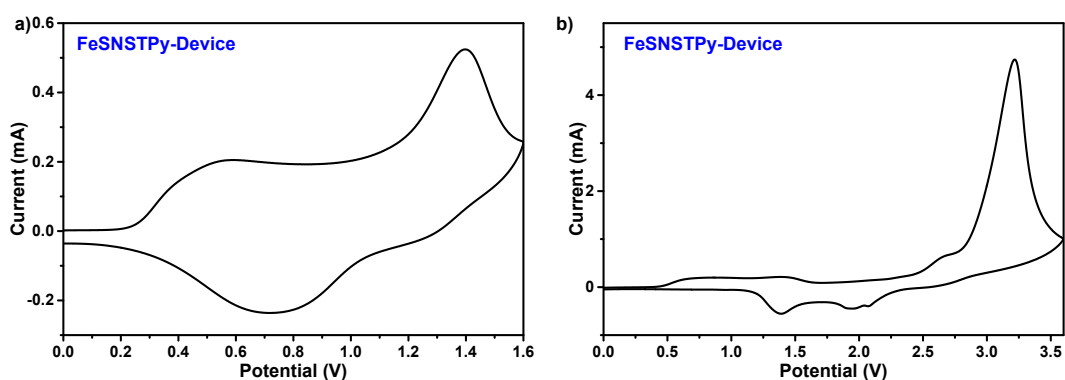

Fig. S10. CV curves of FeSNSTPy device from (a) 0-1.6 V and (b) 0-3.6 V.

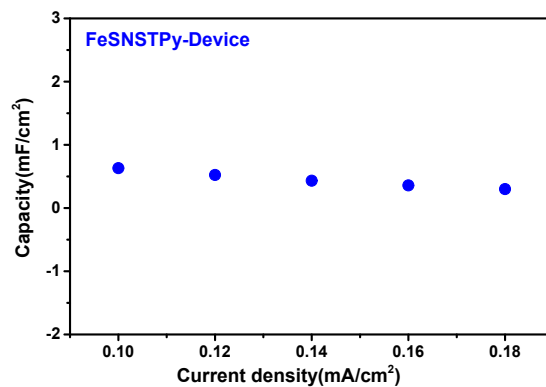

Fig. S11. Dependent of areal and volume capacitance of FeSNSTPy device on the discharging rate at various charging current densities.

**Table S1.** Electrochromic color parameters at different voltages.

| Compound        | Voltage(V) | $L^*$ | $a^*$ | $b^*$  |
|-----------------|------------|-------|-------|--------|
| <b>FeSNSTPy</b> | 0          | 59.19 | 3.27  | 6.92   |
|                 | 0.88       | 59.76 | 1.5   | 3.26   |
|                 | 0.9        | 59.84 | -0.12 | 0.17   |
|                 | 0.92       | 60.09 | -1.55 | -2.16  |
|                 | 0.95       | 60.51 | -3.37 | -5.08  |
|                 | 0.97       | 60.93 | -6.35 | -9.76  |
|                 | 1          | 62.23 | -6.77 | -8.69  |
|                 | 1.05       | 62.98 | -7.72 | -9.02  |
|                 | 1.07       | 63.69 | -7.8  | -8.53  |
|                 | 1.1        | 64.03 | -8.44 | -9.53  |
|                 | 1.12       | 64.27 | -8.5  | -10.19 |
|                 | 1.15       | 64.43 | -8.71 | -11.58 |
|                 | 1.17       | 65.15 | -8.19 | -10.98 |
|                 | 1.2        | 65.97 | -7.91 | -8.93  |
|                 | 1.22       | 68.15 | -8    | 0.86   |
| 1.25            | 71.09      | -7.46 | 14.09 |        |
